# Supplementary material
Source: MDPI journal article supplement (https://www.mdpi.com/2073-4352/9/12/664)
Supplement: s1 [file s1]

# Coordination Assemblies of Two Zn(II) Coordination Polymers: Positional Isomeric Effect and Luminescent Property

**Table S1** Selected bond lengths [ $\text{\AA}$ ] and bond angles [ $^\circ$ ] for CPs **1** and **2**

**1**

|                   |            |                   |            |
|-------------------|------------|-------------------|------------|
| Zn(1)-O(1)        | 2.0067(18) | Zn(1)-N(1)        | 2.009(2)   |
| O(1)-Zn(1)-O(1)#1 | 89.98(11)  | O(1)-Zn(1)-N(1)#1 | 107.67(8)  |
| O(1)-Zn(1)-N(1)   | 121.23(8)  | N(1)#1-Zn(1)-N(1) | 108.94(12) |

**2**

|                   |            |                   |            |
|-------------------|------------|-------------------|------------|
| Zn(1)-O(3)#2      | 1.9652(15) | Zn(1)-O(1)        | 1.9669(14) |
| Zn(1)-N(3)        | 2.0193(17) | Zn(1)-N(1)        | 2.0207(16) |
| O(3)#2-Zn(1)-O(1) | 109.18(6)  | O(3)#2-Zn(1)-N(3) | 112.37(7)  |
| O(1)-Zn(1)-N(3)   | 107.27(7)  | O(3)#2-Zn(1)-N(1) | 118.92(7)  |
| O(1)-Zn(1)-N(1)   | 99.30(6)   | N(3)-Zn(1)-N(1)   | 108.52(7)  |

symmetry codes: #1  $x, -y+1/2, -z+1/2$ , #2  $-x+1, -y+1, -z$ .

**Table S2.** Hydrogen Bond Lengths ( $\text{\AA}$ ) and Bond Angles ( $^\circ$ ) for **1** and **2**

| CPs      | D-H $\cdots$ A                         | d(D-H)  | d(H $\cdots$ A) | d(D $\cdots$ A) | $\angle$ DHA |
|----------|----------------------------------------|---------|-----------------|-----------------|--------------|
| <b>1</b> | N(2)-H(2) $\cdots$ O(1) <sup>a</sup>   | 0.8600  | 2.0800          | 2.931(3)        | 170.00       |
|          | C(6)-H(6) $\cdots$ O(2)                | 0.9300  | 2.3900          | 3.014(3)        | 125.00       |
|          | N(2)-H(2) $\cdots$ O(5) <sup>b</sup>   | 0.8600  | 2.0800          | 2.933(3)        | 173.00       |
|          | N(4)-H(4) $\cdots$ O(2) <sup>c</sup>   | 0.8600  | 1.9000          | 2.753(2)        | 170.00       |
|          | O(5)-H(5A) $\cdots$ O(2)               | 0.75(4) | 2.17(4)         | 2.915(3)        | 174(4)       |
| <b>2</b> | O(5)-H(5B) $\cdots$ O(3) <sup>d</sup>  | 0.74(4) | 2.59(4)         | 3.185(3)        | 139(4)       |
|          | C(5)-H(5) $\cdots$ O(4) <sup>e</sup>   | 0.9300  | 2.5800          | 3.468(2)        | 159.00       |
|          | C(8)-H(8) $\cdots$ O(4) <sup>e</sup>   | 0.9300  | 2.5000          | 3.366(3)        | 155.00       |
|          | C(11)-H(11) $\cdots$ O(4) <sup>e</sup> | 0.9300  | 2.5100          | 3.416(2)        | 165.00       |
|          | C(12)-H(12) $\cdots$ O(2)              | 0.9300  | 2.3900          | 3.162(2)        | 140.00       |

Symmetry codes: (a)  $1/2+x, 1/2-y, -1/2+z$ ; (b)  $x, 1+y, z$ ; (c)  $2-x, 1-y, -z$ ; (d)  $1-x, 1-y, -z$ ; (e)  $1+x, 1+y, 1+z$ .

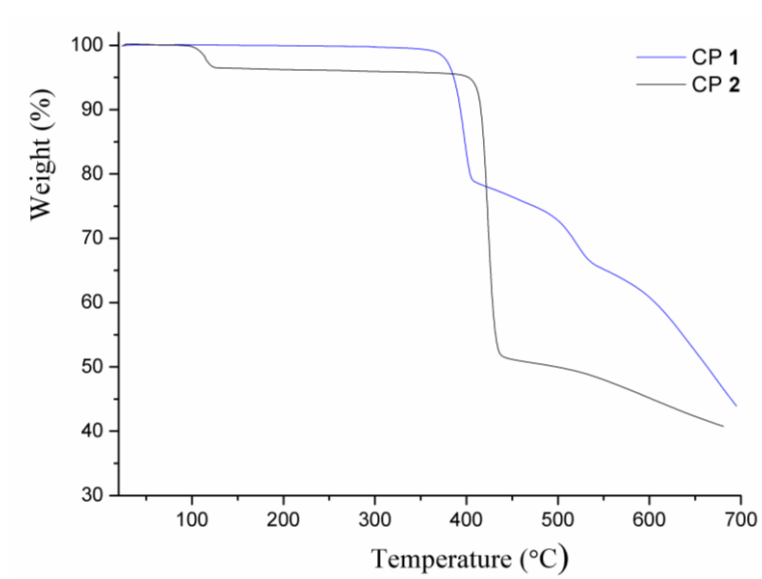

**Figure S1.** The TG curves of CPs 1 and 2.

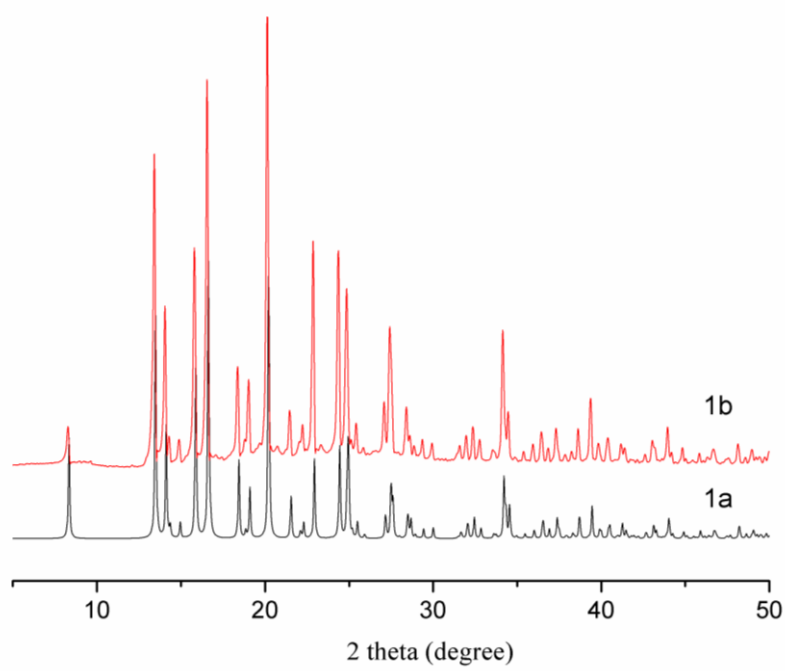

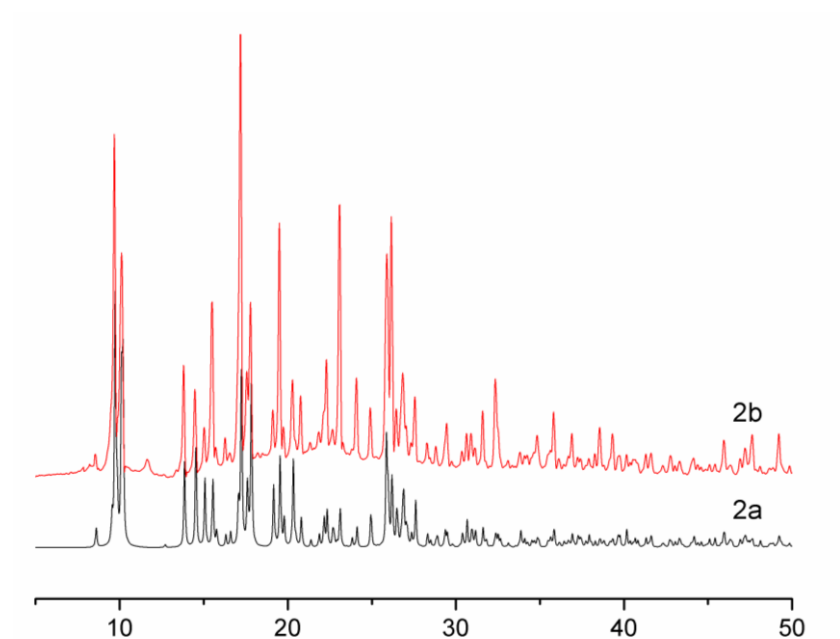

**Figure S2.** The X-ray powder diffraction patterns of CPs **1** and **2**: a – simulated; b – as-synthesized.

The fitting values of decay curves (b) of CPs **1** and **2** in Figure 5.

| Model           | ExpDec 1              |            |                |
|-----------------|-----------------------|------------|----------------|
| Equation        | $y=A1*\exp(-x/t1)+y0$ |            |                |
| Reduced Chi-Sqr | 2389.70375            |            |                |
| Adj.R-Square    | 0.99084               |            |                |
|                 |                       | value      | Standard Error |
| C               | y0                    | -1.12387   | 0.80742        |
|                 | A1                    | 11327.7183 | 24.30321       |
|                 | t1                    | 14.08947   | 0.04444        |
|                 | k                     | 0.07097    | 2.23888E-4     |
|                 | tau                   | 9.76608    | 0.03081        |

|                 |                       |             |                |
|-----------------|-----------------------|-------------|----------------|
| Model           | ExpDec 1              |             |                |
| Equation        | $y=A1*\exp(-x/t1)+y0$ |             |                |
| Reduced Chi-Sqr | 2565.47694            |             |                |
| Adj.R-Square    | 0.99187               |             |                |
|                 |                       | value       | Standard Error |
| C               | y0                    | 0.1996      | 0.83717        |
|                 | A1                    | 12060.59406 | 24.4243        |
|                 | t1                    | 15.11439    | 0.04491        |
|                 | k                     | 0.06616     | 1.95593E-4     |
|                 | tau                   | 10.4765     | 0.03113        |
